# Supplementary material for: Diel variations in planktonic ciliate community structure in the northern South China Sea and tropical Western Pacific
Source: Copernicus journal article supplement (doi:10.5194/bg-2022-151), 2022-08-12
Supplement: Supplementary file 1 [file bg-2022-151-supplement.pdf]

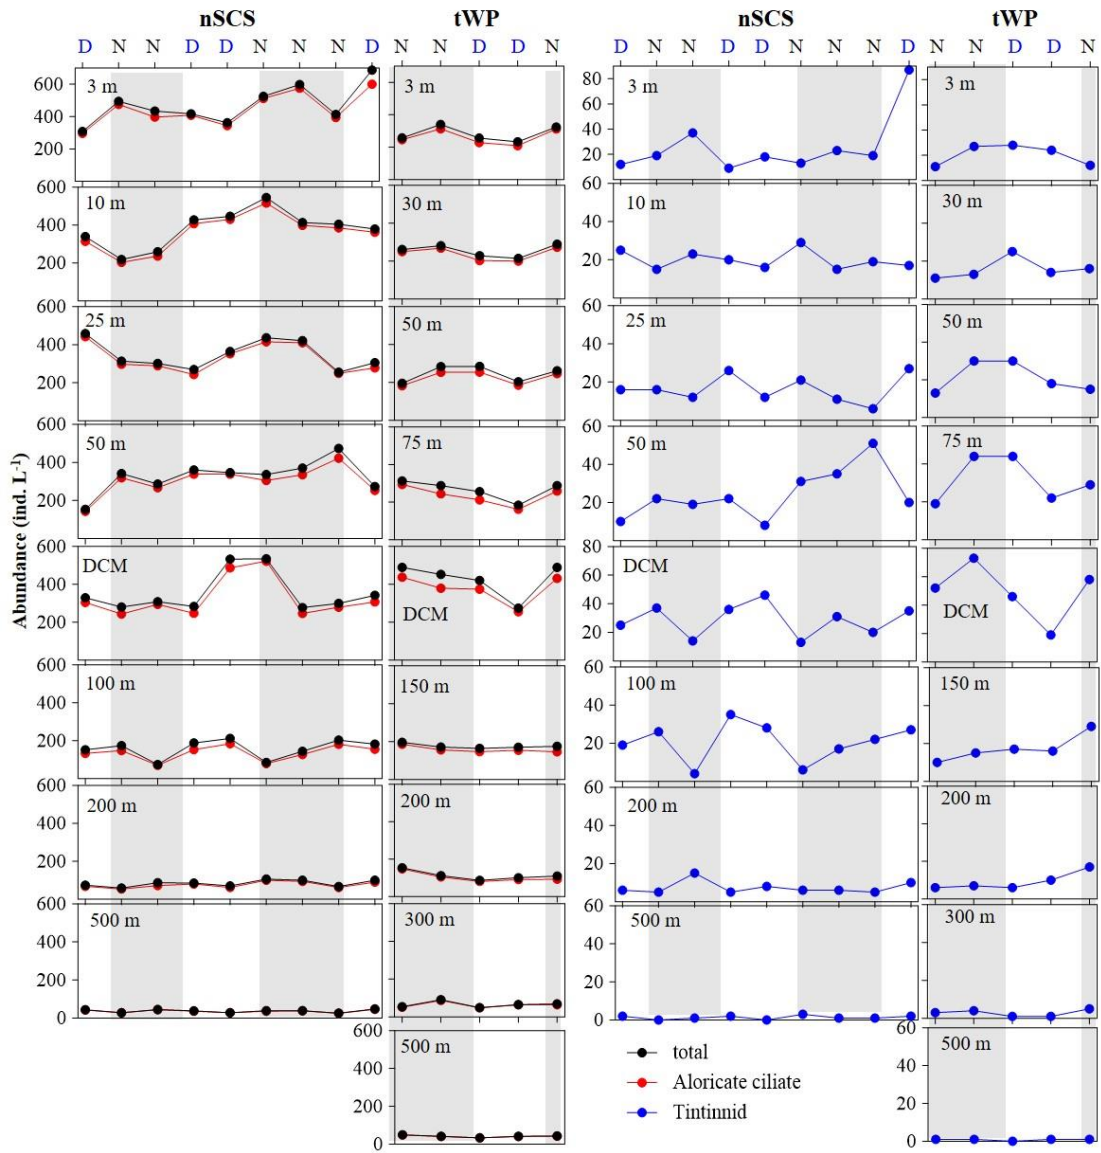

1  
2  
3  
4

**Fig. S1.** Day (D)-night (N) variations of ciliate (total, aloricate ciliate and tintinnid) abundance at each depth in the nSCS and tWP. Black shadows: night.

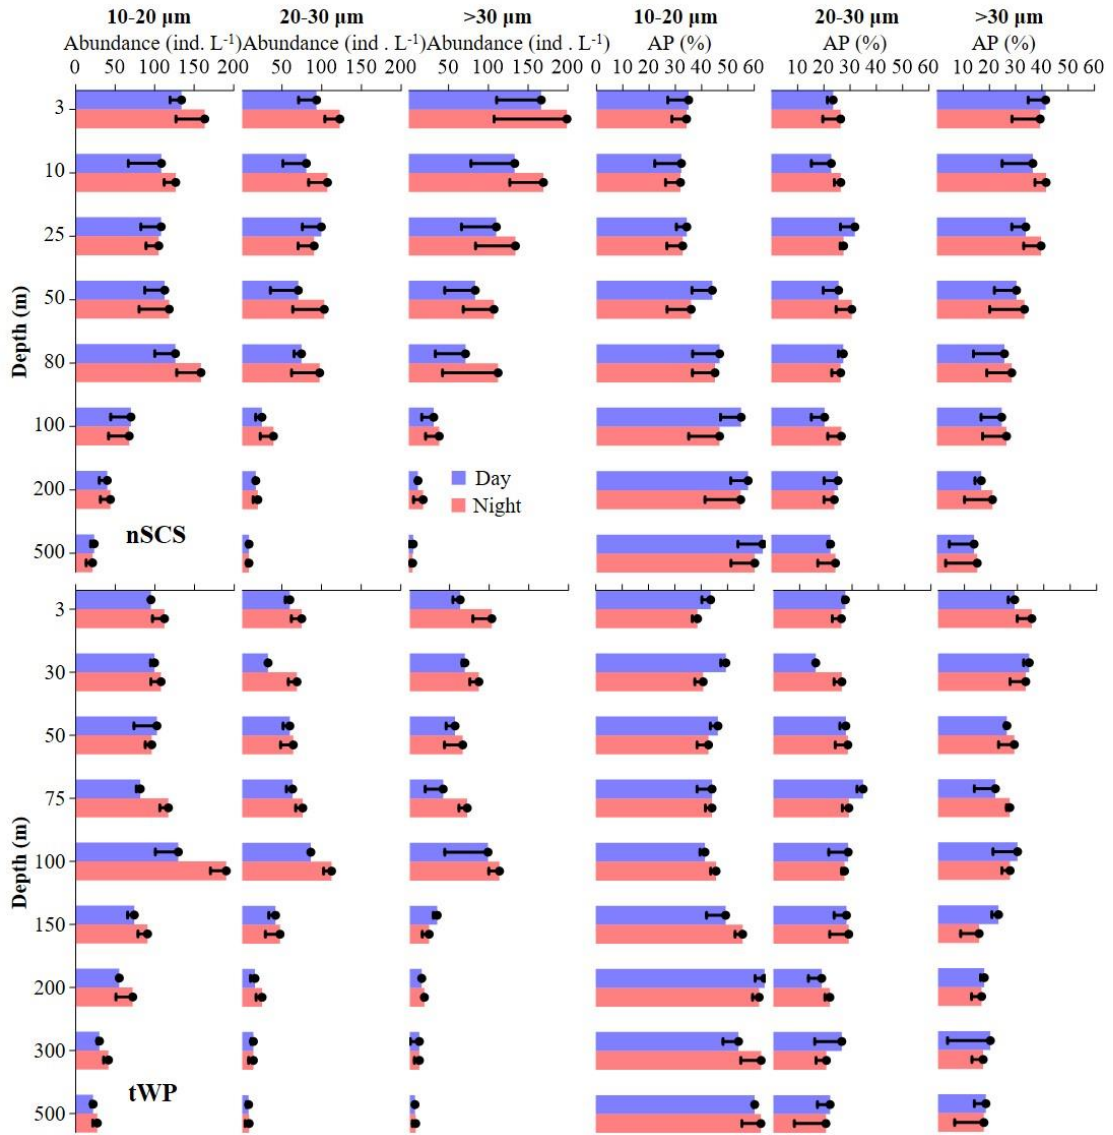

5

6 **Fig. S2.** Day-night variations of average abundance and abundance proportion (AP) of each  
 7 aloricate ciliate size-fraction at each layers in the nSCS and tWP.

8

9

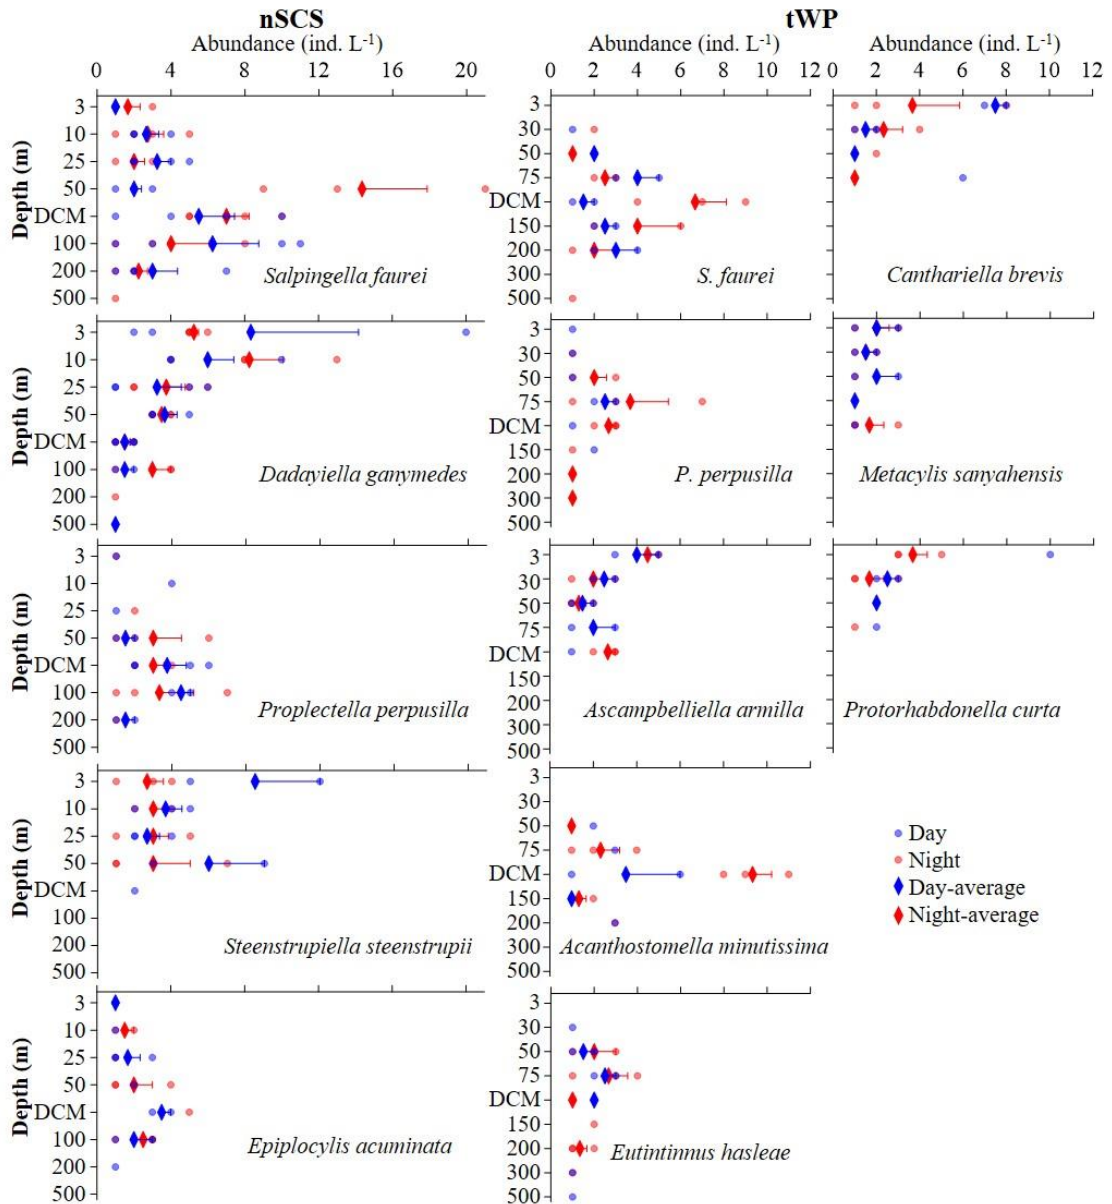

10

11 **Fig. S3.** Day-night variations of vertical distribution of tintinnid dominant species (average)  
 12 abundance from surface to 500 m in the nSCS and tWP.

13

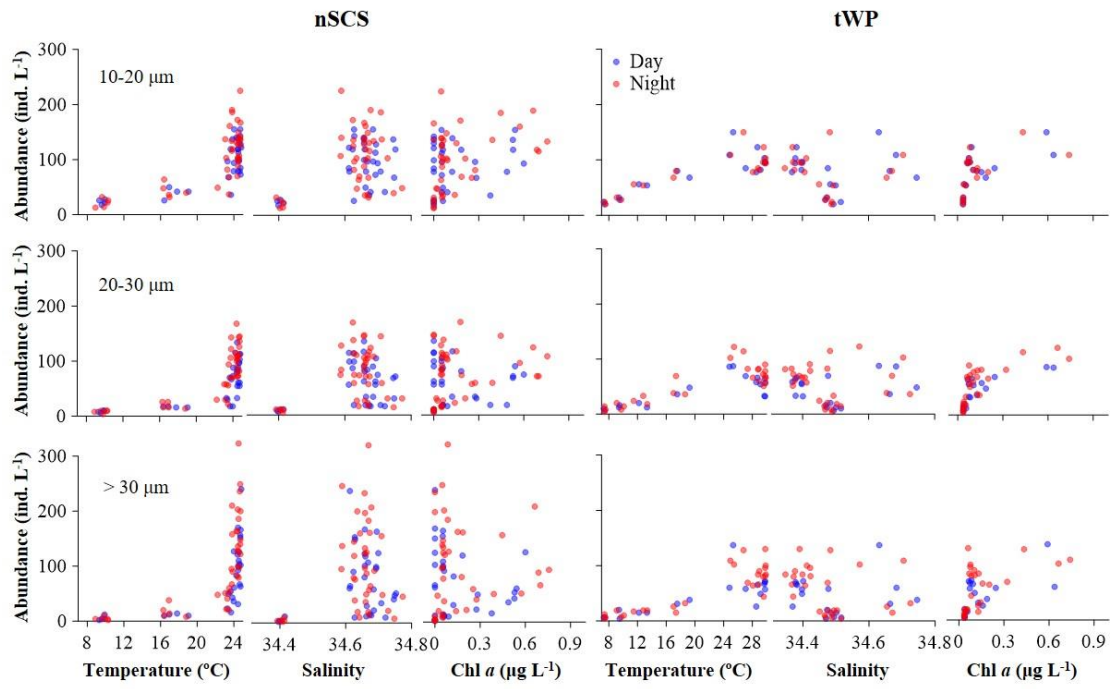

14

15 **Fig. S4.** Relationship between aloricate ciliate abundance and temperature, salinity, Chl *a* in the  
 16 nSCS and tWP.

17

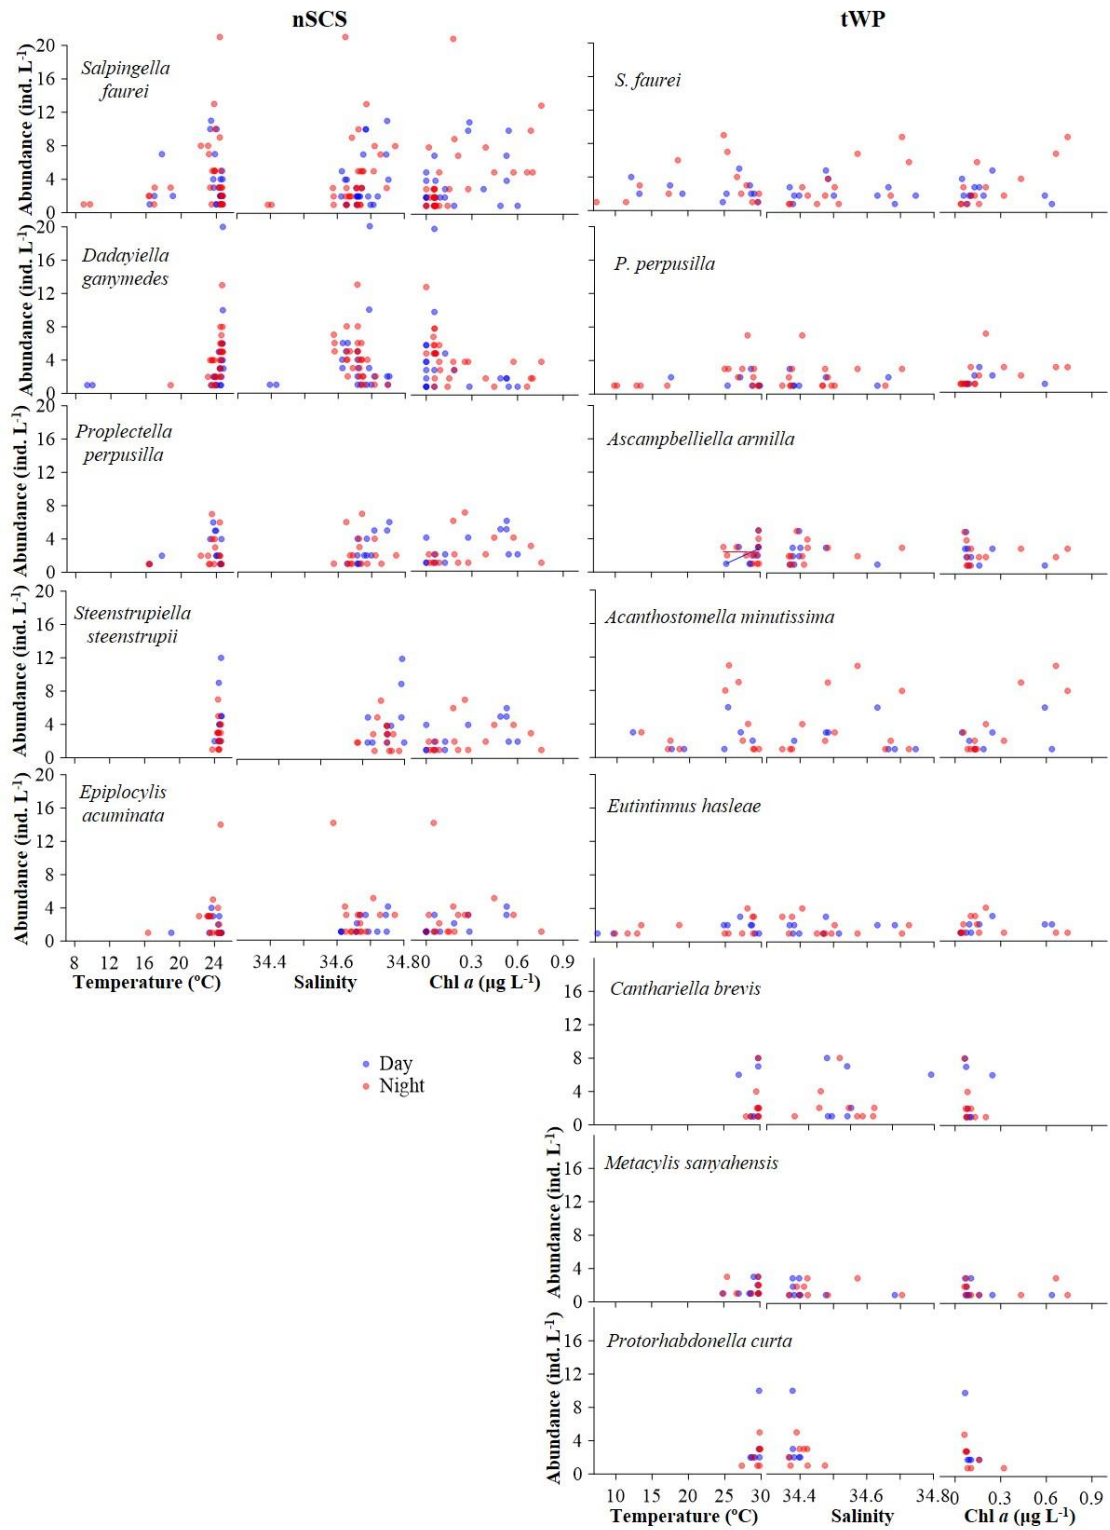

18

19 **Fig. S5.** Relationship between tintinnid dominant species abundance and temperature, salinity, Chl  
 20 *a* in the nSCS and tWP.

21

22

**Table S1** Tintinnid species dimensions (LL: lorica length,  $\mu\text{m}$ ; LOD: lorica oral diameter,  $\mu\text{m}$ ), biogeography type (BT), maximum abundance ( $A_{\text{max}}$ , ind.  $\text{L}^{-1}$ ), occurrence frequency (OF, %) and its dominance index ( $Y$ ) at day and night in the northern South China Sea (nSCS) and tropical West Pacific (tWP).

| Species                               | LL                 | LOD              | BT | nSCS-Day         |       |       | nSCS-Night       |       |       | tWP-Day          |              |             | tWP-Night        |              |             |
|---------------------------------------|--------------------|------------------|----|------------------|-------|-------|------------------|-------|-------|------------------|--------------|-------------|------------------|--------------|-------------|
|                                       |                    |                  |    | $A_{\text{max}}$ | OF    | $Y$   | $A_{\text{max}}$ | OF    | $Y$   | $A_{\text{max}}$ | OF           | $Y$         | $A_{\text{max}}$ | OF           | $Y$         |
| <i>Acanthostomella conicoides</i>     | 38.41 $\pm$ 2.02   | 20.14 $\pm$ 1.21 | C  | 1                | 12.5  | <0.01 | 4                | 15.00 | <0.01 | 3                | 22.22        | <0.01       | 8                | 22.22        | <0.01       |
| <i>A. lata</i> *                      | 36.86 $\pm$ 1.60   | 28.09 $\pm$ 1.18 | C  | -                | -     | -     | -                | -     | -     | 3                | 5.56         | <0.01       | 5                | 7.41         | <0.01       |
| <b><i>A. minutissim</i></b>           | 25.58 $\pm$ 3.14   | 18.84 $\pm$ 1.11 | C  | -                | -     | -     | -                | -     | -     | <b>6</b>         | <b>38.89</b> | <b>0.02</b> | <b>11</b>        | <b>44.44</b> | <b>0.04</b> |
| <i>Amphorellopsis acantharus</i>      | 60.82 $\pm$ 3.14   | 24.92 $\pm$ 0.51 | C  | -                | -     | -     | -                | -     | -     | 4                | 16.67        | <0.01       | 7                | 14.81        | <0.01       |
| <i>Amphorides amphora</i> *           | 92.80 $\pm$ 10.37  | 39.89 $\pm$ 2.70 | C  | 3                | 28.13 | <0.01 | 4                | 20.00 | <0.01 | 1                | 11.11        | <0.01       | 1                | 22.22        | <0.01       |
| <i>A. laackmanni</i> *                | 86.93 $\pm$ 8.72   | 25.90 $\pm$ 0.96 | C  | -                | -     | -     | 2                | 5.00  | <0.01 | -                | -            | -           | -                | -            | -           |
| <i>A. minor</i>                       | 69.78 $\pm$ 2.01   | 36.10 $\pm$ 1.19 | C  | 1                | 3.13  | <0.01 | 1                | 2.50  | <0.01 | 1                | 11.11        | <0.01       | 3                | 22.22        | <0.01       |
| <i>A. quadrilineata</i>               | 113.41 $\pm$ 13.57 | 48.26 $\pm$ 3.50 | C  | 3                | 12.5  | <0.01 | 4                | 15.00 | <0.01 | 1                | 5.56         | <0.01       | 2                | 7.41         | <0.01       |
| <b><i>Ascampbelliella armilla</i></b> | 29.73 $\pm$ 1.81   | 22.37 $\pm$ 1.18 | W  | 1                | 12.5  | <0.01 | 4                | 12.50 | <0.01 | <b>5</b>         | <b>50.00</b> | <b>0.04</b> | <b>5</b>         | <b>44.44</b> | <b>0.03</b> |
| <i>A. retusa</i> *                    | 33.65 $\pm$ 3.46   | 30.00 $\pm$ 0.96 | W  | -                | -     | -     | 4                | 5.00  | <0.01 | 2                | 16.67        | <0.01       | 4                | 18.52        | <0.01       |
| <i>Brandtiella palliata</i> *         | 146.75 $\pm$ 4.35  | 46.26 $\pm$ 2.46 | W  | -                | -     | -     | -                | -     | -     | -                | -            | -           | 2                | 11.11        | <0.01       |
| <b><i>Canthariella brevis</i></b>     | 64.94 $\pm$ 3.11   | 29.69 $\pm$ 1.66 | W  | 2                | 9.38  | <0.01 | 3                | 7.50  | <0.01 | <b>8</b>         | <b>38.89</b> | <b>0.03</b> | 8                | 33.33        | <0.02       |
| <i>C. pyramidata</i> *                | 52.71 $\pm$ 2.20   | 27.46 $\pm$ 0.79 | W  | -                | -     | -     | 1                | 2.50  | <0.01 | 3                | 5.56         | <0.01       | 1                | 14.81        | <0.01       |
| <i>C. truncata</i> *                  | 49.08 $\pm$ 2.47   | 27.57 $\pm$ 1.06 | W  | -                | -     | -     | -                | -     | -     | -                | -            | -           | 1                | 3.70         | <0.01       |
| <i>Climacocylis scalaria</i> *        | 222.41 $\pm$ 45.54 | 54.01 $\pm$ 5.88 | W  | 3                | 3.13  | <0.01 | 1                | 7.50  | <0.01 | 1                | 11.11        | <0.01       | -                | -            | -           |
| <i>Codonella grahami</i> *            | 65.80 $\pm$ 0.74   | 47.48 $\pm$ 0.31 | C  | -                | -     | -     | 2                | 2.50  | <0.01 | -                | -            | -           | -                | -            | -           |
| <i>Codonellopsis meridionalis</i> *   | 182.71 $\pm$ 10.47 | 58.91 $\pm$ 1.19 | C  | -                | -     | -     | -                | -     | -     | 1                | 5.56         | <0.01       | 1                | 3.70         | <0.01       |
| <i>C. morchella</i> *                 | 89.62 $\pm$ 11.28  | 33.75 $\pm$ 0.94 | C  | -                | -     | -     | 2                | 10.00 | <0.01 | -                | -            | -           | -                | -            | -           |
| <i>C. robusta</i> *                   | 67.40 $\pm$ 10.24  | 33.12 $\pm$ 1.66 | C  | -                | -     | -     | 1                | 2.50  | <0.01 | 1                | 5.56         | <0.01       | -                | -            | -           |
| <i>Coxiella laciniosa</i> *           | 83.16 $\pm$ 8.08   | 60.09 $\pm$ 0.57 | -  | 1                | 3.13  | <0.01 | -                | -     | -     | 1                | 11.11        | <0.01       | 1                | 3.70         | <0.01       |
| <i>Cyttarocylis acutiformis</i> *     | 228.29             | 124.69           | W  | -                | -     | -     | -                | -     | -     | 1                | 5.56         | <0.01       | -                | -            | -           |

|                                |               |             |   |           |              |             |           |              |             |          |              |             |          |              |             |
|--------------------------------|---------------|-------------|---|-----------|--------------|-------------|-----------|--------------|-------------|----------|--------------|-------------|----------|--------------|-------------|
| <i>Dadayiella ganymedes</i>    | 92.40 ±12.87  | 28.95 ±1.85 | C | <b>20</b> | <b>68.75</b> | <b>0.11</b> | <b>13</b> | <b>72.50</b> | <b>0.12</b> | 2        | 27.78        | <0.01       | 4        | 25.93        | <0.01       |
| <i>D. pachytoecus</i> *        | 96.72 ±4.04   | 32.23 ±1.52 | C | 1         | 6.25         | <0.01       | 1         | 5.00         | <0.01       | -        | -            | -           | -        | -            | -           |
| <i>Daturella striata</i> *     | 244.36        | 59.58       | W | 1         | 3.13         | <0.01       | -         | -            | -           | -        | -            | -           | -        | -            | -           |
| <i>Dictyocysta reticulata</i>  | 58.29 ±2.55   | 38.42 ±0.82 | C | 2         | 12.5         | <0.01       | 9         | 15.00        | <0.01       | 3        | 5.56         | <0.01       | 1        | 3.70         | <0.01       |
| <i>D. spinosa</i> *            | 52.53 ±1.54   | 35.49 ±1.60 | C | 1         | 6.25         | <0.01       | 1         | 7.50         | <0.01       | -        | -            | -           | -        | -            | -           |
| <i>Epilocylis acuminata</i>    | 70.16 ±4.93   | 50.27 ±2.68 | W | 4         | 40.63        | <0.02       | <b>14</b> | <b>40.00</b> | <b>0.02</b> | 1        | 16.67        | <0.01       | 2        | 11.11        | <0.01       |
| <i>E. constricta</i>           | 109.09 ±7.59  | 59.65 ±1.40 | W | 2         | 12.5         | <0.01       | 6         | 5.00         | <0.01       | -        | -            | -           | 1        | 11.11        | <0.01       |
| <i>E. undella</i> *            | 155.44 ±14.14 | 72.05 ±1.22 | W | -         | -            | -           | -         | -            | -           | 2        | 5.56         | <0.01       | -        | -            | -           |
| <i>Eutintinnus apertus</i>     | 58.01 ±13.45  | 26.89 ±1.63 | C | 3         | 25           | <0.01       | 4         | 30.00        | <0.01       | 2        | 33.33        | 0.01        | 5        | 29.63        | <0.01       |
| <i>E. fraknoi</i>              | 248.43 ±27.90 | 46.46 ±1.94 | C | 1         | 15.63        | <0.01       | 1         | 7.50         | <0.01       | 2        | 22.22        | <0.01       | 1        | 11.11        | <0.01       |
| <i>E. hasleae</i>              | 42.07 ±10.47  | 30.02 ±2.78 | C | 1         | 6.25         | <0.01       | -         | -            | -           | <b>3</b> | <b>50.00</b> | <b>0.03</b> | <b>4</b> | <b>44.44</b> | <b>0.02</b> |
| <i>E. lusus-undae</i>          | 179.97 ±20.25 | 42.74 ±3.58 | C | 2         | 25           | <0.01       | 6         | 30.00        | <0.01       | 2        | 11.11        | <0.01       | 2        | 18.52        | <0.01       |
| <i>E. pacificus</i> *          | 67.92 ±13.68  | 26.15 ±1.50 | C | 1         | 6.25         | <0.01       | -         | -            | -           | 2        | 11.11        | <0.01       | 5        | 11.11        | <0.01       |
| <i>E. stramentus</i> *         | 165.01 ±20.05 | 24.66 ±1.42 | C | -         | -            | -           | 1         | 2.50         | <0.01       | -        | -            | -           | 1        | 3.70         | <0.01       |
| <i>E. tubulosus</i> *          | 121.980       | 30.54       | C | -         | -            | -           | -         | -            | -           | -        | -            | -           | 1        | 3.70         | <0.01       |
| <i>Metacylis sanyahensis</i>   | 24.90 ±4.53   | 23.53 ±1.48 | C | -         | -            | -           | 1         | 2.50         | <0.01       | <b>3</b> | <b>50.00</b> | <b>0.02</b> | 3        | 33.33        | 0.01        |
| <i>Ormosella bresslaui</i> *   | 55.31         | 31.27       | - | -         | -            | -           | -         | -            | -           | 1        | 5.56         | <0.01       | -        | -            | -           |
| <i>Parundella aculeata</i>     | 160.54 ±18.38 | 30.37 ±0.95 | C | 8         | 15.63        | <0.01       | 4         | 25.00        | <0.01       | -        | -            | -           | -        | -            | -           |
| <i>P. difficilis</i> *         | 107.59 ±13.97 | 41.94 ±2.18 | C | 2         | 6.25         | <0.01       | 1         | 2.50         | <0.01       | -        | -            | -           | -        | -            | -           |
| <i>P. inflata</i>              | 105.18 ±4.18  | 29.25 ±1.03 | C | -         | -            | -           | -         | -            | -           | 3        | 11.11        | <0.01       | 7        | 18.52        | <0.01       |
| <i>P. praetenuis</i> *         | 124.25 ±2.93  | 32.68 ±0.17 | C | 4         | 3.13         | <0.01       | 1         | 5.00         | <0.01       | -        | -            | -           | -        | -            | -           |
| <i>Poroecus curtus</i> *       | 62.46 ±1.07   | 28.11 ±0.91 | W | 1         | 3.13         | <0.01       | -         | -            | -           | 1        | 11.11        | <0.01       | -        | -            | -           |
| <i>Proplectella claparedei</i> | 67.11 ±2.87   | 43.52 ±2.01 | W | -         | -            | -           | 1         | 2.50         | <0.01       | 1        | 16.67        | <0.01       | 1        | 14.81        | <0.01       |
| <i>P. parva</i>                | 56.38 ±2.93   | 27.77 ±0.61 | W | 7         | 9.38         | <0.01       | 8         | 20.00        | <0.01       | 1        | 5.56         | <0.01       | 2        | 25.93        | <0.01       |
| <i>P. perpusilla</i>           | 44.62 ±4.67   | 28.78 ±0.72 | W | <b>6</b>  | <b>40.63</b> | <b>0.03</b> | <b>7</b>  | <b>40.00</b> | <b>0.02</b> | 3        | 38.89        | 0.01        | <b>7</b> | <b>55.56</b> | <b>0.04</b> |
| <i>P. urna</i> *               | 33.12 ±2.59   | 14.90 ±0.68 | W | 1         | 6.25         | <0.01       | -         | -            | -           | -        | -            | -           | 1        | 11.11        | <0.01       |

|                                   |               |             |   |           |              |             |           |              |             |           |              |             |          |              |             |
|-----------------------------------|---------------|-------------|---|-----------|--------------|-------------|-----------|--------------|-------------|-----------|--------------|-------------|----------|--------------|-------------|
| <i>Protorhabdonella curta</i>     | 42.15 ±5.14   | 28.70 ±1.78 | C | 1         | 3.13         | <0.01       | 1         | 5.00         | <0.01       | <b>10</b> | <b>33.33</b> | <b>0.02</b> | 5        | 29.63        | 0.01        |
| <i>P. simplex</i>                 | 54.15 ±3.19   | 33.68 ±1.00 | C | 2         | 9.38         | <0.01       | 10        | 12.50        | <0.01       | 1         | 27.78        | <0.01       | 3        | 22.22        | <0.01       |
| <i>Rhabdonella amor</i>           | 87.19 ±2.94   | 46.40 ±1.77 | W | 1         | 9.38         | <0.01       | 12        | 5.00         | <0.01       | -         | -            | -           | 1        | 7.41         | <0.01       |
| <i>R. conica</i> *                | 386.31        | 60.37       | W | -         | -            | -           | 1         | 5.00         | <0.01       | -         | -            | -           | -        | -            | -           |
| <i>R. cornucopia</i> *            | 134.39 ±8.23  | 51.23 ±2.85 | W | -         | -            | -           | 8         | 12.50        | <0.01       | -         | -            | -           | -        | -            | -           |
| <i>R. elegans</i> *               | 169.05        | 44.96       | W | 1         | 3.13         | <0.01       | -         | -            | -           | -         | -            | -           | -        | -            | -           |
| <i>R. exilis</i>                  | 67.07 ±5.14   | 28.63 ±1.51 | W | 2         | 3.13         | <0.01       | 3         | 12.50        | <0.01       | 1         | 22.22        | <0.01       | 1        | 22.22        | <0.01       |
| <i>R. poculum</i> *               | 86.50 ±1.31   | 47.4 ±0.51  | W | 1         | 6.25         | <0.01       | 12        | 5.00         | <0.01       | -         | -            | -           | -        | -            | -           |
| <i>R. sanyahensis</i>             | 131.57 ±7.66  | 37.63 ±6.19 | W | 2         | 12.5         | <0.01       | 1         | 2.50         | <0.01       | -         | -            | -           | -        | -            | -           |
| <i>Rhabdonellopsis apophysata</i> | 279.46 ±15.06 | 57.38 ±2.35 | W | 1         | 6.25         | <0.01       | -         | -            | -           | 2         | 5.56         | <0.01       | 1        | 11.11        | <0.01       |
| <i>Salpingella acuminata</i>      | 250.35 ±50.31 | 30.35 ±3.28 | C | 5         | 15.63        | <0.01       | 4         | 17.50        | <0.01       | 2         | 27.78        | <0.01       | 4        | 29.63        | <0.01       |
| <i>S. curta</i>                   | 95.56 ±9.90   | 14.01 ±0.64 | C | 3         | 15.63        | <0.01       | 5         | 20.00        | <0.01       | 4         | 27.78        | <0.01       | 3        | 29.63        | 0.01        |
| <i>S. decurtata</i> *             | 147.27 ±16.45 | 17.33 ±1.85 | C | 4         | 18.75        | <0.01       | 5         | 12.50        | <0.01       | 1         | 27.78        | <0.01       | 2        | 22.22        | <0.01       |
| <b><i>S. faurei</i></b>           | 121.11 ±15.72 | 13.05 ±0.87 | C | <b>11</b> | <b>78.13</b> | <b>0.13</b> | <b>21</b> | <b>82.50</b> | <b>0.15</b> | <b>5</b>  | <b>61.11</b> | <b>0.06</b> | <b>9</b> | <b>48.15</b> | <b>0.04</b> |
| <i>S. minutissima</i> *           | 77.51 ±7.73   | 13.33 ±0.52 | C | -         | -            | -           | 2         | 5.00         | <0.01       | -         | -            | -           | -        | -            | -           |
| <i>S. rotundata</i> *             | 98.08 ±14.36  | 14.21 ±1.97 | C | 4         | 3.13         | <0.01       | 1         | 2.50         | <0.01       | -         | -            | -           | -        | -            | -           |
| <i>Steenstrupiella gracilis</i>   | 76.77 ±3.67   | 31.48 ±1.93 | C | 4         | 34.38        | <0.02       | 6         | 40.00        | <0.02       | 3         | 33.33        | <0.01       | 2        | 25.93        | <0.01       |
| <i>S. intumescens</i>             | 206.20 ±16.10 | 36.52 ±1.62 | C | 2         | 12.5         | <0.01       | 2         | 7.50         | <0.01       | 4         | 27.78        | <0.01       | 3        | 14.81        | <0.01       |
| <i>S. robusta</i>                 | 113.78 ±12.94 | 34.60 ±1.85 | C | 8         | 31.25        | <0.02       | 6         | 12.50        | <0.01       | -         | -            | -           | -        | -            | -           |
| <b><i>S. steenstrupii</i></b>     | 153.72 ±12.03 | 35.07 ±1.58 | C | <b>12</b> | <b>34.38</b> | <b>0.03</b> | <b>7</b>  | <b>37.50</b> | <b>0.02</b> | 2         | 22.22        | <0.01       | 3        | 3.70         | <0.01       |
| <i>Xystonellopsis brandti</i> *   | 201.57 ±7.81  | 33.35 ±1.07 | W | -         | -            | -           | -         | -            | -           | 1         | 5.56         | <0.01       | 1        | 3.70         | <0.01       |
| <i>X. favata</i>                  | 233.88        | 61.79       | W | -         | -            | -           | 1         | 2.50         | <0.01       | -         | -            | -           | -        | -            | -           |

Note: The biogeography of tintinnid genera (e.g. cosmopolitan and warm water types) were derived according to Dolan et al. (2013); \*: species with counting number <10; Species in bold black were regarded as dominant species in an assemblage with  $Y \geq 0.02$ ; The LL and LOD were presented as mean values  $\pm$  standard deviation. C: Composition; W: Warm Water; -: not classified in Dolan et al. (2013).



1 **Table S2** Day-night variations in tintinnid species genera, species richness,  
 2 biogeography type (BT) and its percentage (BTP, %) in the northern South China Sea  
 3 (nSCS) and tropical West Pacific (tWP).

| Seas  | Day/Night | Genera | Species richness | BT |    |   | BTP   |       |      |
|-------|-----------|--------|------------------|----|----|---|-------|-------|------|
|       |           |        |                  | C  | W  | - | C     | W     | -    |
| nSCS  | Day       | 19     | 44               | 27 | 16 | 1 | 61.36 | 36.36 | 2.28 |
|       | Night     | 19     | 49               | 31 | 18 | 0 | 63.27 | 36.73 | 0    |
|       | All       | 23     | 57               | 34 | 22 | 1 | 59.65 | 38.6  | 1.75 |
| tWP   | Day       | 24     | 44               | 27 | 15 | 2 | 61.36 | 34.09 | 4.55 |
|       | Night     | 21     | 45               | 28 | 16 | 1 | 62.22 | 35.56 | 2.22 |
|       | All       | 25     | 51               | 29 | 20 | 2 | 56.86 | 39.22 | 3.92 |
| Total |           | 27     | 69               | 40 | 27 | 2 | 57.97 | 39.13 | 2.9  |

4
